# Supplementary material for: Kurarinone Attenuates Collagen-Induced Arthritis in Mice by Inhibiting Th1/Th17 Cell Responses and Oxidative Stress
Source: PubMed Central journal article supplement (PMC8069507; doi:10.3390/ijms22084002), 2021-04-13

# Supplemental Fig S1

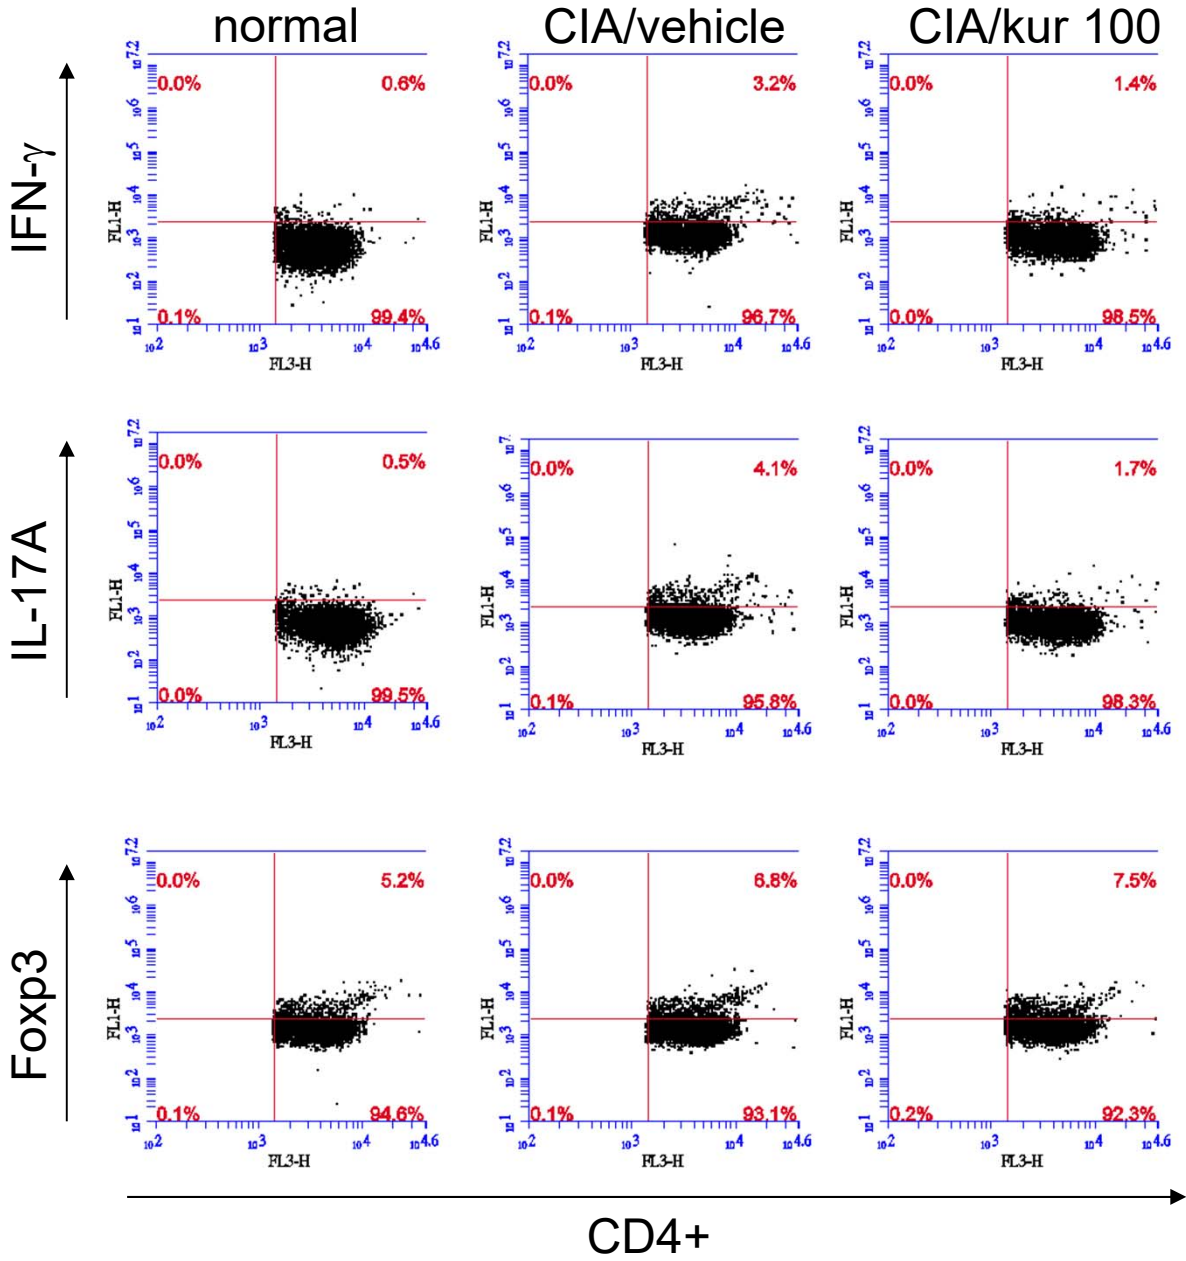

# Supplemental Fig S2

A

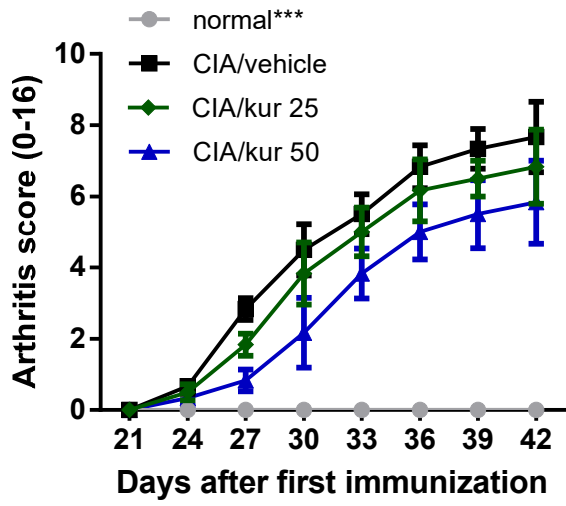

B

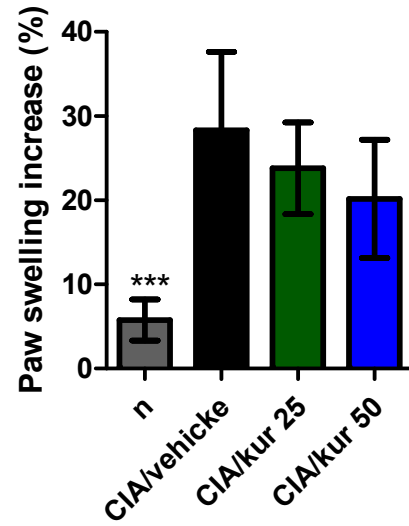

Supplement: ijms-22-04002-s001.pdf [file ijms-22-04002-s001.pdf]
